# Supplementary material for: Observation of ferromagnetism in CeCr2Si2C single crystals
Source: Royal Society of Chemistry journal article supplement (doi:10.1039/d2ta07902j), 2023-01-01
Supplement: d2ta07902j1.pdf [file d2ta07902j1.pdf]

## Supplementary Information

### Observation of ferromagnetism in $\text{CeCr}_2\text{Si}_2\text{C}$ single crystals

Guobin Wang<sup>1,2</sup>, Long Chen<sup>1,2</sup>, Jun Deng<sup>1</sup>, Yuxin Yang<sup>1,2</sup>, Tao Sun<sup>1</sup>, Zesheng Zhang<sup>3</sup>,

Xu Chen<sup>1\*</sup>, Hui Li<sup>1,2\*</sup>

<sup>1</sup>*Beijing National Laboratory for Condensed Matter Physics, Institute of Physics,*

*Chinese Academy of Sciences, Beijing 100190, China*

<sup>2</sup>*University of Chinese Academy of Sciences, Beijing 100049, China*

<sup>3</sup>*Beijing Lattice Semiconductor Co., Ltd., Beijing 101300, China*

*E-mail: [xchen@iphy.ac.cn](mailto:xchen@iphy.ac.cn) or [lihui2021@iphy.ac.cn](mailto:lihui2021@iphy.ac.cn)*

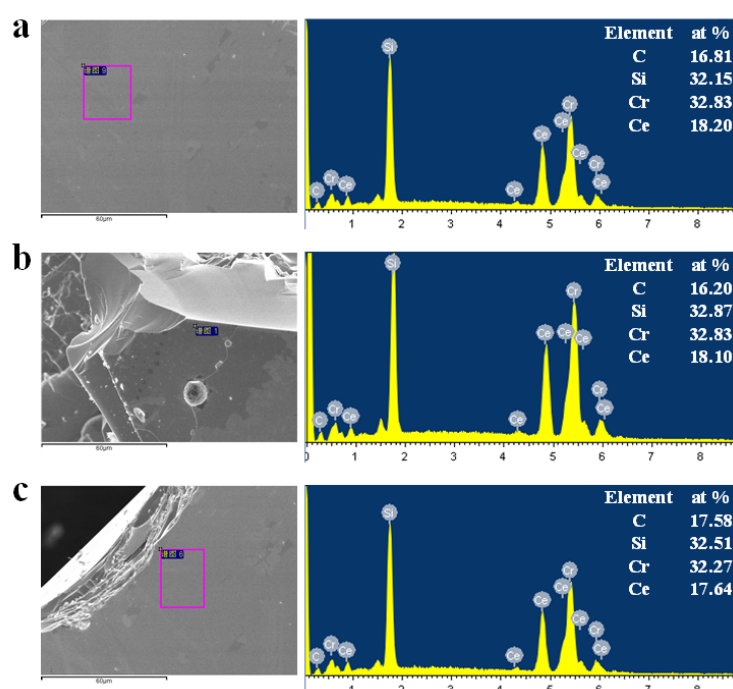

**Fig. S1.** EDXS spectra of  $\text{CeCr}_2\text{Si}_2\text{C}$  bulk single crystals.

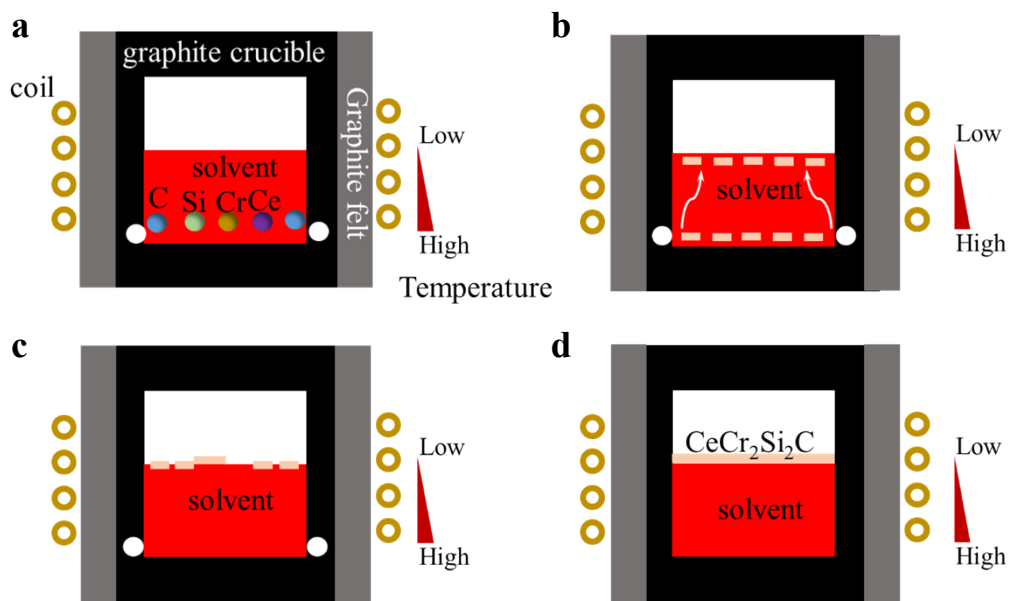

**Fig. S2.** Illustration of the growth mechanism for  $\text{CeCr}_2\text{Si}_2\text{C}$  single crystals via high temperature solution technique.

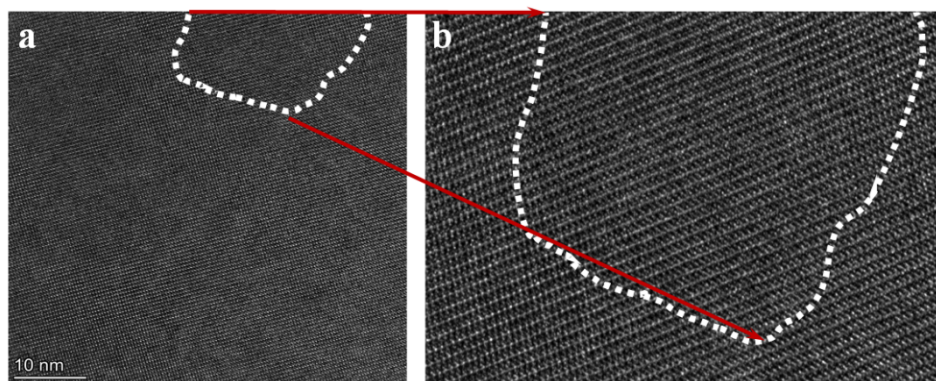

**Fig. S3.** (a) HRTEM and (b) magnified HRTEM images of CeCr<sub>2</sub>Si<sub>2</sub>C single crystals, showing stacking disorders in the CeCr<sub>2</sub>Si<sub>2</sub>C single crystals.

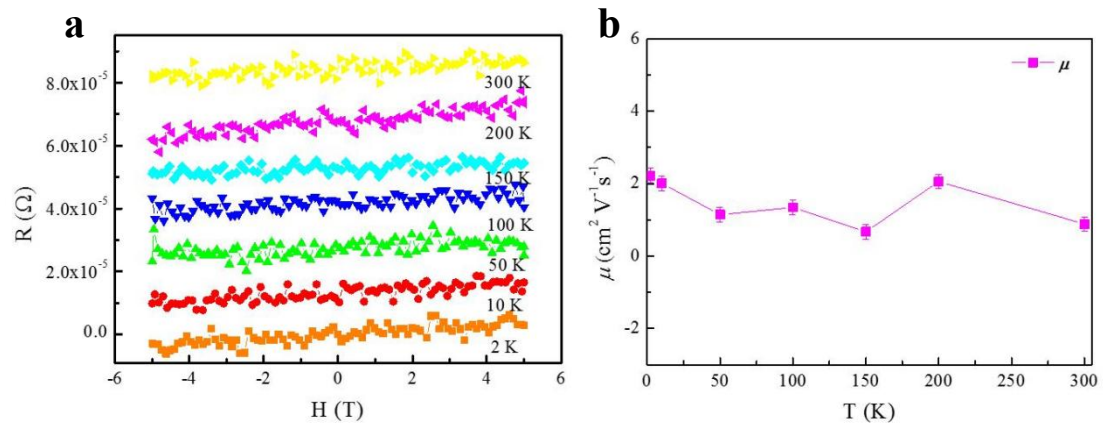

**Fig. S4.** (a) Hall resistivity ( $R - H$ ) and (b) mobility ( $\mu$ ) measured in the temperature region of 2-300 K for  $\text{CeCr}_2\text{Si}_2\text{C}$  bulk single crystals.

**RESULTS SUMMARY**

|                      |                                             |                                 |
|----------------------|---------------------------------------------|---------------------------------|
| Rs: 0.006795 ohm/sq  | RHs: +2.45e-06 m <sup>2</sup> C             | Ns: +2.544e+20 /cm <sup>2</sup> |
| R : 0.0001359 ohm-cm | Mob: 3.61 cm <sup>2</sup> V <sup>-1</sup> s | N : +1.272e+22 /cm <sup>2</sup> |

**CONTACT CHECK**

| Pair | ohms |
|------|------|
| 12   | 12   |
| 23   | 13   |
| 34   | 12   |
| 41   | 11   |
| 13   | 14   |
| 24   | 11   |

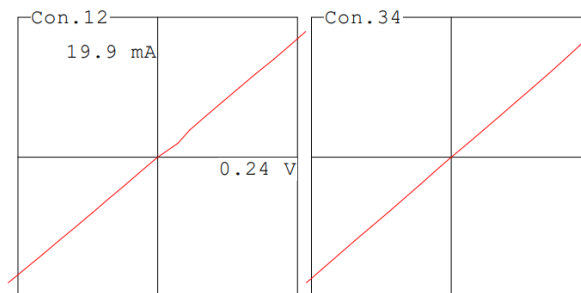

**Fig. S5.** Hall measurement results of CeCr<sub>2</sub>Si<sub>2</sub>C single crystals.
